# **Delta-band neural envelope tracking predicts speech intelligibility in noise in preschoolers**

**Tilde Van Hirtum <sup>a,\*</sup>, Ben Somers, Eline Verschueren, Benjamin Dieudonné, Tom Francart**

*<sup>a</sup>KU Leuven – University of Leuven, Department of Neurosciences, Experimental Oto-rhino-laryngology, Herestraat 49 bus 721, 3000 Leuven, Belgium.*

Correspondence\*:

Tilde Van Hirtum

Herestraat 49, bus 721, 3000 Leuven, Belgium

[tilde.vanhirtum@kuleuven.be](mailto:tilde.vanhirtum@kuleuven.be)

## ABSTRACT

Behavioral tests are currently the gold standard in measuring speech intelligibility. However, these tests can be difficult to administer in young children due to factors such as motivation, linguistic knowledge and cognitive skills. It has been shown that measures of neural envelope tracking can be used to predict speech intelligibility and overcome these issues. However, its potential as an objective measure for speech intelligibility in noise remains to be investigated in preschool children. Here, we evaluated neural envelope tracking as a function of signal-to-noise ratio (SNR) in 14 5-year-old children. We examined EEG responses to natural, continuous speech presented at different SNRs ranging from -8 (very difficult) to 8 dB SNR (very easy). As expected delta band (0.5-4 Hz) tracking increased with increasing stimulus SNR. However, this increase was not strictly monotonic as neural tracking reached a plateau between 0 and 4 dB SNR, similarly to the behavioral speech intelligibility outcomes. These findings indicate that neural tracking in the delta band remains stable, as long as the acoustical degradation of the speech signal does not reflect significant changes in speech intelligibility. Theta band tracking (4-8 Hz), on the other hand, was found to be drastically reduced and more easily affected by noise in children, making it less reliable as a measure of speech intelligibility. By contrast, neural envelope tracking in the delta band was directly associated with behavioral measures of speech intelligibility. This suggests that neural envelope tracking in the delta band is a valuable tool for evaluating speech-in-noise intelligibility in preschoolers, highlighting its potential as an objective measure of speech in difficult-to-test populations.

Keywords: Neural tracking, EEG, Children, Speech in noise, Speech intelligibility

## 1 INTRODUCTION

1 Globally, 34 million children (~0.2% of all children aged 0 to 18 years) have disabling  
2 hearing loss, i.e., hearing loss greater than 30 decibels (dB) in the better ear (report of  
3 World Health Organization, 2021). The prevalence rises to 5% when mild and unilateral  
4 hearing losses are also considered (Wang et al., 2019). Unaddressed hearing loss has been  
5 proven to affect children's speech and language development, educational attainments  
6 and social skills. Through early detection and interventions many of these impacts can be  
7 mitigated, highlighting the importance of accurate hearing diagnostics (O'Donoghue, 2013).  
8 Evaluation of speech intelligibility is a fundamental component of hearing loss assessment  
9 and rehabilitation. It can determine speech intelligibility and discrimination of speech  
10 features, and provides insight into the perceptual abilities of an individual (Eggermont,  
11 2017). The current gold standard in measuring speech intelligibility relies heavily on  
12 behavioral tests. While these tests are reliable and fast in healthy adults, it can be difficult  
13 to assess speech intelligibility in children. A child's abilities and limitations in the language  
14 domain as well as their cognitive abilities strongly affect the results of a behavioral test.  
15 Moreover, the type of response task, the speech material, and children's motivation and  
16 involvement should also be considered (Mendel, 2008). In addition, measures of speech  
17 intelligibility are often restricted to testing in quiet, due to a lack of appropriate and reliable  
18 speech in noise tasks (van Wieringen & Wouters, 2022). However, the high prevalence of  
19 noise in children's natural listening environments, especially in settings where children learn  
20 and play (e.g., clamorous classrooms and rowdy playgrounds), poses serious challenges  
21 for a still immature auditory system (e.g., Ambrose et al., 2014; Neuman et al., 2010).  
22 Therefore it is essential that we can measure the ability to understand speech in these noisy,  
23 everyday environments.

24 An objective approach, using EEG to measure neural tracking in response to natural  
25 running speech, could overcome the current challenges in pediatric hearing assessment  
26 and provide a more reliable measure of a child's speech intelligibility (for a review see

27 Gillis et al., 2022b). Neural tracking refers to the process by which neural responses in a  
28 listener's brain time-lock to dynamic patterns of the presented speech, such as the speech  
29 envelope. The speech envelope contains acoustical information (Rosen, 1992) and reflects  
30 phoneme, syllable and word boundaries (Peelle et al., 2013), which are critical for speech  
31 intelligibility (Shannon et al., 1995).

32 Indeed, a rich literature has found that during speech perception, auditory neural activity  
33 tracks the temporal fluctuations of the speech envelope in frequency bands matching the  
34 important occurrences of speech information, i.e., phrases/sentences (below 2 Hz) and  
35 syllables (2-8 Hz) (Vander Ghinst et al., 2019; Ding et al., 2016; Bourguignon et al., 2013;  
36 Ahissar et al., 2001; Gross et al., 2013; Meyer et al., 2017; Molinaro & Lizarazu, 2017).  
37 More importantly regarding diagnostic purposes, many researchers have shown that neural  
38 envelope tracking is affected by the intelligibility of the presented speech (Peelle et al., 2013;  
39 Gross et al., 2013; Di Liberto et al., 2018) and is significantly correlated with behavioral  
40 measures of speech intelligibility (Ding et al., 2014; Vanthornhout et al., 2018; Lesenfants  
41 et al., 2019a; Verschueren et al., 2021).

42 Most of the above-mentioned studies have been conducted in adults. Research on neural  
43 envelope tracking in children is scarce, despite the functional relevance that neural tracking  
44 might have for objectively measuring children's speech intelligibility. Moreover, cross-  
45 sectional evidence shows that auditory neural activity changes drastically during childhood  
46 (e.g., Cragg et al., 2011; Vander Ghinst et al., 2019; Schneider & Maguire, 2019; Panda  
47 et al., 2020), which makes it difficult to extrapolate outcomes from neural tracking research  
48 in adults to children. Furthermore, previous research in children mostly involved older  
49 children (> 10 years) with dyslexia, focusing on the relation between neural tracking and  
50 reading development/experience. These studies show consistent coherence in the delta  
51 frequency range (0.5-4 Hz) (Molinaro et al., 2016) and theta (4-8 Hz) (Abrams et al., 2009;  
52 Molinaro et al., 2016) using natural speech. In addition, they found that dyslexic children  
53 have impaired tracking at low frequencies (< 2 Hz) compared to typically developing

54 children (Molinaro et al., 2016; Power et al., 2013, 2016; Di Liberto et al., 2018; Destoky  
55 et al., 2022).

56 Although evidence of the neural tracking mechanisms in typically developing children is  
57 limited, more recent studies have been able to show successful neural tracking of continuous  
58 natural speech in both infants (<1 year) (Kalashnikova et al., 2018; Tan et al., 2022; Attaheri  
59 et al., 2022) and young children between 4 and 9 years old (Vander Ghinst et al., 2019;  
60 Ríos-López et al., 2020; Tan et al., 2022). For example, Ríos-López et al. (2020) showed  
61 that speech-brain coupling already occurs at 4 years of age in the delta-band frequency  
62 range, but not at theta frequencies. Similarly, Vander Ghinst et al. (2019) found significant  
63 speech tracking in children aged 6-9 at < 1 Hz frequencies, while neural envelope tracking  
64 was reduced or even absent in the theta band.

65 Furthermore, neural envelope tracking in children has typically been evaluated under  
66 optimal, noiseless listening conditions. Findings from multiple, behavioral studies provided  
67 evidence that mature performance on a wide range of speech-in-noise measures is  
68 established by about 9-10 years of age, while younger children require a higher signal-to-  
69 noise ratio (SNR) to achieve adult-like performance (for a review see Leibold 2017). Thus,  
70 children seem more susceptible to the detrimental effects of noise on speech intelligibility.  
71 Only one study to our knowledge has studied neural tracking of speech-in-noise in typically  
72 developing children using magnetoencephalography (MEG). In accordance to behavioral  
73 measures, Vander Ghinst et al. (2019) found that neural tracking differs between typically  
74 developing children and adults and, that noise differentially corrupts neural tracking in  
75 children. In adults, their results showed a clear effect of noise at delta frequencies (<1 Hz),  
76 that is, a decrease in coherence as SNR decreased and speech is less intelligible. However,  
77 in children increasing noise decreased coherence more strongly than in adults. Additionally,  
78 children's coherence was drastically reduced or even absent in comparison with adults in the  
79 theta band regardless of SNR. Generally, these results are in line with previous behavioral  
80 studies showing children's poorer speech intelligibility in adverse listening conditions

81 (Johnson, 2000; Talarico et al., 2007; Neuman et al., 2010; Leibold, 2017). However, we  
82 cannot conclude from this study that delta and/or theta coherence is directly related to  
83 speech-in-noise intelligibility, since only indirect behavioral measures (e.g., intelligibility  
84 rating) were included. In addition, MEG-based recordings were used and various practical  
85 aspects of MEG in its current form (e.g., cost) pose a limitation to its large-scale usability  
86 in clinical practice, compared to electroencephalography (EEG) (Destoky et al., 2019).

87 Our recent research provides a framework for investigating neural tracking of different  
88 speech features, including the speech envelope (Lesenfants et al., 2019b; Verschueren  
89 et al., 2021; Gillis et al., 2022b), using EEG. The approach combines both linear  
90 decoding (backward-modelling) and encoding (forward-modelling) models, providing  
91 complementary information about neural tracking. The backward model is a model to  
92 reconstruct the speech envelope from the associated EEG recording, whereas the forward  
93 model predicts the EEG responses to speech and can be used to study the spatio-temporal  
94 dynamics of the response similarly to event related potentials (ERPs). This is the first study  
95 to use this method in preschoolers and we aim to investigate the validity of a measure  
96 that has previously been used only with adults (e.g., Vanthornhout et al., 2018). More  
97 specifically, in this study, we investigate (i) the effect of SNR on neural envelope tracking  
98 in preschoolers, and (ii) whether neural envelope tracking reflects speech intelligibility by  
99 evaluating the correspondence between neural envelope tracking and behavioral measures of  
100 speech intelligibility in noise. We have two specific hypotheses. First, we predicted that as  
101 SNR increases, neural envelope tracking increases, given that previous research has shown  
102 that stronger neural responses are associated with better speech intelligibility (Ahissar  
103 et al., 2001; Peelle et al., 2013; Ding et al., 2014; Vanthornhout et al., 2018). Secondly, we  
104 hypothesize that, similar to studies in adults (Vanthornhout et al., 2018; Lesenfants et al.,  
105 2019a), behaviorally measured speech intelligibility in noise is significantly correlated with  
106 our neural, objective measure.

## 2 MATERIALS AND METHODS

### 107 2.1 Participants

108 Fourteen 5-year-old children, recruited from the third year of kindergarten, participated in  
109 the experiment (6 female). All children were native Dutch speakers, had normal peripheral  
110 hearing (hearing thresholds  $\leq 30$  dB HL for frequencies from 0.5 to 4 kHz) and had normal  
111 or corrected to normal vision. None of the children were at risk for a cognitive or language  
112 delay nor had a family history of developmental disorders, as reported by the parents. The  
113 study protocol was approved by the local Medical Ethics Committee (reference no. S57102)  
114 and all parents provided written informed consent before the experiment. All children  
115 received a gift voucher for participating.

### 116 2.2 Behavioral measurements

#### 117 2.2.1 Speech-in-noise intelligibility

118 Speech intelligibility in noise was assessed using the Leuven Intelligibility Peuter Test  
119 (Lilliput; van Wieringen & Wouters, 2022). This test consist of 20 lists of 11 three-phoneme  
120 consonant-vowel-consonant words (e.g., “bus”) uttered by a female speaker. All lists were  
121 presented in a stationary speech-weighted noise, matching the long-term average spectrum  
122 of the speaker. The noise level was fixed at 65 dB SPL, whereas the speech level was  
123 adjusted to obtain the targeted SNRs. Each child started with 1 training list at 0 dB SNR.  
124 Thereafter, different lists were presented monaurally to the right ear at four fixed SNRs:  
125 0, -3, -6 and -9 dB SNR. If necessary, additional lists at -12 dB SNR (i.e., if scores at  
126 -9 dB SNR  $>50\%$ ) were presented. Two lists were presented per SNR. Children were  
127 instructed to recall each word as accurately as possible. The result of the Lilliput test is a  
128 phoneme score, i.e. the number of phonemes correctly repeated by the child. The average  
129 phoneme score per SNR was used for further analysis. Words were played through Peltor

130 H7A headphones using the software platform APEX (Francart et al., 2008) on a Samsung  
131 Galaxy Tab A tablet.

## 132 2.2.2 Receptive language

133 Children's receptive language skills were examined using the Peabody Picture Vocabulary  
134 Test-III-NL (PPVT-III-NL; Dunn & Dunn, 1997). The PPVT-III-NL was administered in  
135 order to confirm the absence of a language impairment. It is a norm-referenced test that  
136 consists of selecting 1 of 4 pictures corresponding to a given word, at increasing levels  
137 of difficulty. Raw scores were calculated as the total responses correct and converted to  
138 age-adjusted standard scores ( $100 \pm 15$ ; mean  $\pm$  SD) according to the standard values  
139 included in the test manual. The mean of the PPVT-III scores was 114 (SD = 12.82), ranging  
140 from 86 to 127 showing that all children performed well within age norms.

## 141 2.3 EEG experimental procedure

### 142 2.3.1 Speech material and procedure

143 During the EEG recordings, children listened to four different stories of "Little Polar Bear",  
144 the children's series by Hans de Beer, narrated by the same native Flemish speaker as the  
145 Lilliput. Each story was 10 to 12 minutes long and segmented in two-minute fragments  
146 taking sentence boundaries into account. The stories were presented in a stationary speech-  
147 weighted noise, obtained by the long-term average spectrum of all stories together. For all  
148 stories the speech level was fixed at 60 dB A, while the noise level was adjusted to obtain  
149 five SNR conditions: 8, 4, 0, -4 and -8 dB SNR. Every two-minute segment was presented  
150 randomly at a different SNR. In total, every SNR was presented three times (i.e., 6 minutes),  
151 with the exception of the easiest SNR condition (8 dB SNR). The 8 dB SNR condition was  
152 presented for an additional 6 minutes at the end of the recording session.



### 153 2.3.2 Data acquisition

154 EEG signals were recorded using a Biosemi ActiveTwo System at a sample rate of 8192  
155 Hz. This system uses 64 Ag/AgCl electrodes, distributed over the scalp according to the  
156 international 10-20 system. The electrode offsets were kept between -30mV and 30mV to  
157 ensure stable recording.

158 All recordings were carried out in a soundproof and electrically shielded room, using a  
159 child-friendly and age-appropriate protocol. Children were comfortably seated in a chair  
160 approximately 1 m from a sound-permeable screen. Speech stimuli were presented at a  
161 sample rate of 48000 Hz through a GENELEC (8020A) loudspeaker positioned at head-  
162 height of the seated child using the software platform APEX (Francart et al., 2008) and an  
163 RME Fireface UC soundcard (Haimhausen, Germany). To mimic a storytelling scenario  
164 children watched images of the corresponding “Little Polar Bear” books projected on the  
165 screen in front of them while listening to the stories.

166 Children were instructed to attend to the stories and to avoid moving as much as possible.  
167 Additionally, children were accompanied by an experienced test leader in the EEG cabin to  
168 monitor alertness and movement. During each story, each child was asked 3 multiple-choice  
169 comprehension questions to improve attention. Short recesses between each two-minute  
170 segment and each different story were also used to motivate the children and, if necessary,  
171 allow them to rest or move before resuming the story.

### 172 2.4 EEG data analysis

173 We measured neural tracking of the speech envelope as a function of stimulus SNR using  
174 an envelope reconstruction approach (backward-modelling) and temporal response function  
175 estimation (forward-modelling). All signal processing was performed offline using Matlab  
176 R2016b (The MathWorks Inc, 2016).

## 177 2.4.1 Envelope reconstruction

178 To measure neural envelope tracking, we used the envelope reconstruction approach  
179 described in detail by Vanthornhout et al. (2018) and Verschueren et al. (2020). In summary,  
180 the speech envelope was extracted according to Biesmans et al. (2017) who showed good  
181 reconstruction accuracy using a gammatone filter bank followed by a power law. The  
182 acoustic envelope was then downsampled from 48000 to 256 Hz in order to decrease  
183 computation time. Next, the speech envelope was band-pass filtered between 0.5-4 Hz  
184 (delta band) and 4-8 Hz (theta band) using a Chebyshev filter (with 80 dB attenuation  
185 and 10% outside the passband) and further downsampled to 128 Hz. Similarly to the  
186 speech envelope, the EEG data was first downsampled from 8192 Hz to 256 Hz. Next, a  
187 multi-channel Wiener filter (Somers et al., 2018) was applied to the EEG data to remove  
188 common EEG artifacts such as eye blinks and muscle artifacts. Bad EEG channels were  
189 interpolated from their 5 neighbouring channels using Fieldtrip (Oostenveld et al., 2011).  
190 We then re-referenced each EEG signal to a common-average reference. Finally, the EEG  
191 data was band-pass filtered similarly to the speech envelope and further downsampled to  
192 128 Hz.

193 For each SNR condition, the reconstructed envelope is obtained by applying a condition-  
194 specific linear decoder, calculated using ridge regression as implemented in the mTRF  
195 toolbox (Lalor et al., 2006). Each decoder is basically a spatiotemporal filter that combines  
196 the 64 EEG channels and their time-shifted versions from 0 to 250 ms (the integration  
197 window) into a reconstruction of the envelope. After normalization, envelope decoders  
198 were trained using a leave-one-out 6-fold cross-validation scheme: for each SNR condition,  
199 containing 6 minutes of EEG data, 5 minutes were used to train the decoder, which  
200 was then applied on the EEG of the remaining minute to obtain a 1-minute envelope  
201 reconstruction. This was repeated 6 times to obtain envelope reconstructions for all folds.  
202 All reconstructions within a SNR condition were concatenated and compared to the original  
203 envelope using a bootstrapped Spearman correlation, resulting in an envelope tracking

204 value for that SNR condition. The significance level of this correlation value is calculated  
205 by constructing a null distribution by correlating 1000 random permutations of the real and  
206 reconstructed envelopes with each other, and taking the 2.5 and 97.5 percentiles to obtain a  
207 95% confidence interval.

#### 208 2.4.2 Temporal response function (TRF) estimation

209 The envelope reconstruction approach is a powerful analysis tool, which integrates  
210 information of multiple EEG channels and their time-shifted versions to reconstruct the  
211 envelope. However, this type of analysis does not allow an interpretation of the spatial  
212 pattern of the response (Haufe et al., 2014). We therefore conducted a linear forward  
213 modelling approach, in addition to the envelope reconstruction approach. This forward  
214 modelling approach predicts EEG given a speech representation and results in a temporal  
215 response function (TRF) for each channel. A TRF represents an impulse response function  
216 of how the brain responds to the stimulus envelope. The main advantage of estimating TRFs  
217 is that their morphology provides valuable insights concerning the neural response latency,  
218 amplitude and topology across the scalp. The first signal processing steps are identical to  
219 the envelope reconstruction approach. Only the band-pass filtering was carried out within  
220 a broader frequency band (0.5-25 Hz), after which the EEG data is normalized. As with  
221 the backward-modelling approach, TRFs are computed using 6-fold cross-validation for  
222 every SNR condition, where 5 minutes are used for training and 1 minute for validation.  
223 TRFs are computed for every channel using the boosting algorithm as described by David  
224 et al. (2007), implemented in the python Eelbrain toolbox (Brodbeck, 2020). In short, this  
225 TRF estimation algorithm works by starting from an all-zero TRF model and iteratively  
226 improving this model by adding a weight at a latency that causes the largest improvement  
227 in the response prediction. The iterations terminate when no significant improvements to  
228 the model can be made anymore for a given step size by which the weights are changed.  
229 The advantage of this method is that the resulting TRF is sparse, i.e., for a well-chosen step  
230 size, only the peaks that contribute most to the response prediction are included in the TRF

231 while other TRF weights are zero. TRFs were computed over a latency range (integration  
232 window) between -200 and 500 ms with an adaptively decreasing stepsize. For further  
233 analysis and visualisation, the estimated TRFs were convolved with a Gaussian kernel of 9  
234 samples long ( $SD=2$ ) to smooth over the time lags. Next, smoothed TRFs were averaged  
235 across all folds.

### 236 2.4.3 Reliability of envelope reconstruction scores

237 To investigate potential changes in neural tracking over the course of the recording session,  
238 we calculated a measure of reliability. In particular, test-retest reliability can be used  
239 to reflect the variation in multiple measurements on the same subject under the same  
240 conditions. Here we quantified test-retest reliability by means of intraclass correlation (ICC)  
241 (Shrout PE, 1979), which is one of the most commonly used reliability measures in the  
242 neuroimaging field (Bennett & Miller, 2010). In this study, every SNR was presented three  
243 times (i.e., 6 minutes), with the exception of the easiest SNR condition. For the 8 dB  
244 SNR condition, an additional 6 minutes were presented at the end of each measurement.  
245 Test-retest reliability was estimated between the envelope reconstructions scores for the  
246 first and last 6 minutes, under the assumption of a single-measurement, absolute-agreement,  
247 two-way mixed model, i.e., ICC(A,1) (Koo & Li, 2016). ICC estimates and their 95%  
248 confidence intervals were calculated using the irr package (Gamer et al., 2019).

## 249 2.5 Statistical analysis

250 Statistical analysis were carried out in R (version 4.0.3; R Core Team, 2020). All tests were  
251 performed with a significance level of  $\alpha = 0.05$  unless otherwise stated.

252 To investigate behavioral speech intelligibility in noise, the speech reception threshold  
253 (SRT; the SNR corresponding to a 50% percentage-correct score) and slope were determined.  
254 For each child individually a sigmoid function was fitted to their average phoneme scores

255 using the following formula:

$$score(SNR) = \frac{1}{1 + e^{-\frac{SNR-SRT}{slope}}} \quad (1)$$

256 To assess the relation between stimulus SNR and neural envelope tracking, we fitted a linear  
257 mixed effect model (LME) per filterband using maximum likelihood criteria with the nlme  
258 package (Pinheiro et al., 2022). The following general formula was used:

$$neuralTracking \sim SNR + random = participant \quad (2)$$

259 where “neuralTracking” represents the Spearman correlation between the real and the  
260 reconstructed envelope, TRF amplitude or latency depending on the outcome measure  
261 being investigated. In addition, a random intercept per participant was included to account  
262 for dependencies between measures from the same child. Residual plots of the selected  
263 model were analyzed to assess the assumption of normality and did not reveal any violations.  
264 All significant effects are discussed in the results section by reporting the  $\beta$  estimates, with  
265 the corresponding standard error (SE), degrees of freedom (df) and test statistics ( $t$ -value and  
266  $p$ -value). Where applicable, post-hoc comparisons were carried out using a non-parametric  
267 Wilcoxon signed-rank test (2-tailed,  $p < 0.01$ ), with Bonferroni correction for multiple  
268 comparisons.

269 Finally, the Spearman correlation between the envelope reconstruction scores and  
270 behaviorally measured speech intelligibility was computed to examine the relation between  
271 neural envelope tracking and speech intelligibility. Since different SNR conditions  
272 were used for the behavioral experiment, we estimated the percentage-correct scores  
273 corresponding to the SNR conditions (i.e. -8, -4, 0, 4 and 8 dB SNR) used for the EEG  
274 measurement from the individually fitted performance intensity functions.

### 3 RESULTS

#### 275 3.1 Behavioral speech intelligibility

276 For each child, we fitted a psychometric curve through their average percentage correct  
277 scores per SNR from which the SRT and slope were derived. The mean of the individual  
278 behavioral SRTs was -5.52 dB SNR (SD = 0.94 dB), with an average slope of 7.99%/dB  
279 (SD = 2.39%/dB). Individual speech intelligibility scores evaluated at the different SNR  
280 conditions are shown in in Figure 1 together with the fitted performance intensity function  
281 on the group average and individual SRT estimates.

#### 282 3.2 Envelope reconstruction

##### 283 3.2.1 Effect of SNR on envelope reconstruction

284 Figure 2 shows neural tracking of the speech envelope as a function of the SNR using a  
285 0-250 ms integration window in the delta (0.5-4 Hz) and theta band (4-8 Hz). These results  
286 were obtained by a leave-one-out cross-validation approach within each 6-minute SNR  
287 block.

288 In the delta band, an increase of neural envelope tracking with increasing SNR was  
289 found ( $b = 0.005$ ,  $SE = 0.0006$ ,  $p < 0.001$ ). However, we observed that neural tracking did  
290 not show a strictly monotonic increase with SNR. To investigate in more detail if neural  
291 tracking differed significantly between adjacent SNR conditions in the delta band, post-hoc  
292 comparisons were carried out using a non-parametric Wilcoxon signed-rank test (2-tailed,  
293  $p < 0.01$ ), with Bonferroni correction for multiple comparisons. Comparisons between  
294 increasing SNR conditions demonstrated that neural tracking increased significantly from -8  
295 to -4 dB SNR ( $p = 0.003$ ;  $r = -0.792$ ) and from -4 to 0 dB SNR ( $p = 0.007$ ;  $r = -0.724$ ), but  
296 not in the two conditions with the lowest noise (0 to 4 dB SNR:  $p = 0.216$ , 4 to 8 dB SNR:  
297  $p = 0.808$ ). Therefore, a sigmoid function was fitted on the data across all subjects. Its

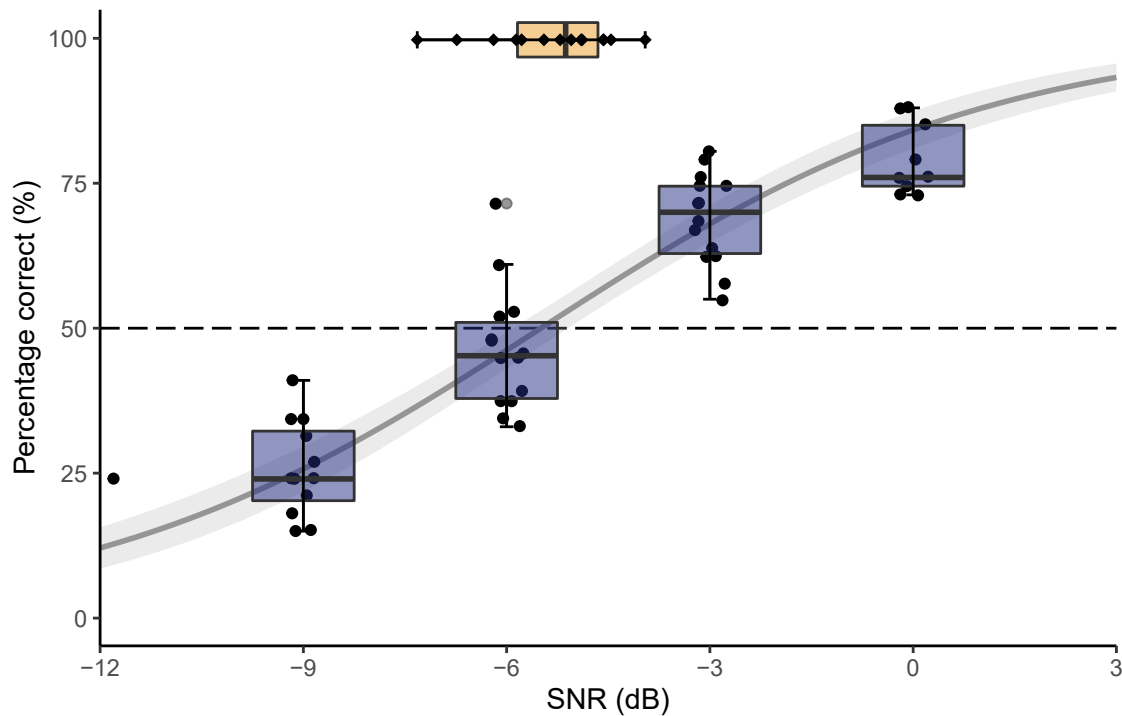

**Figure 1.** Behavioral speech intelligibility. Individual's speech intelligibility (percentage correct) as a function of stimulus SNR and the fitted performance intensity function of the group average. Black dots represent the individual scores. The grey line shows the sigmoid fitted to the data  $\pm$  the error of the fit of the model. The orange boxplot on top shows the distribution of the SRT. Individual SRT estimates are presented as black diamonds to show variation.

298 midpoint was determined at -6.98 dB SNR and, convergence of the function (as calculated  
299 by the 95<sup>th</sup>%-value of the fit) was found around 1.5 dB SNR suggesting that neural tracking  
300 indeed increases with SNR until reaching a plateau between 0 and 4 dB SNR.

301 In the theta band, neural tracking again increased with SNR ( $b = 0.002$ ,  $SE = 0.0006$ ,  
302  $p < 0.001$ ). However, statistically significant responses were limited. Statistically significant  
303 neural tracking was observed at 8 dB SNR in 11 out of 14 children, at 4 and 0 dB SNR in 5  
304 out of 14 children, and at -4 and -8 dB SNR in only 3 out of 14 children. Whereas in the  
305 delta band, statistically significant neural tracking was found in 14 of 14 children down to

306 0 dB SNR, at 13 of 14 children at -4 dB SNR, and at 9 of 14 children at -8 dB SNR. For  
307 further analysis, our frequency range of interest was therefore restricted to the delta band.

### 308 3.2.2 Test-retest reliability of envelope reconstruction scores

309 Test-retest reliability of neural tracking over the course of the recording session was  
310 determined by means of ICC(A,1) for the first and last 6 minutes of speech presented at  
311 8 dB SNR. ICC estimates were calculated based on a single-measure, absolute-agreement,  
312 2-way mixed-effects model. We found a high degree of test-retest reliability of the envelope  
313 reconstruction values in the delta band. The average measure ICC was 0.876, with a 95%  
314 confidence interval from 0.629 to 0.96 ( $F(13,10.2) = 18.3, p < 0.001$ ).

### 315 3.2.3 Effect of speech intelligibility on envelope reconstruction

316 In order to assess the relation between speech intelligibility and neural envelope tracking,  
317 we calculated the percentage-correct scores for each SNR condition used in the EEG  
318 experiment using the individual psychometric curves. Figure 3 shows that neural tracking  
319 in the delta band increased with increasing speech intelligibility ( $r = 0.498; p < 0.001$ ,  
320 Spearman rank correlation), suggesting that the better a child can understand speech, the  
321 higher the neural envelope tracking for that child.

## 322 3.3 Effect of SNR on TRFs

323 The envelope reconstruction analysis showed an S-shape tendency of neural tracking as  
324 a function of SNR. That is, a monotonic increase in envelope tracking over SNR, until  
325 saturating between 0 and 4 dB SNR. To better understand the spatio-temporal properties  
326 of this effect, we calculated TRFs of every 6-minute segment (i.e., each SNR condition).  
327 Based on visual inspection of the topographies, 12 frontocentral channels were selected  
328 (presented by the black dots in Figure 4B) and averaged per subject, resulting in one TRF  
329 per SNR for each subject. Figure 4A shows a prominent peak appearing around  $\sim 83$  ms.



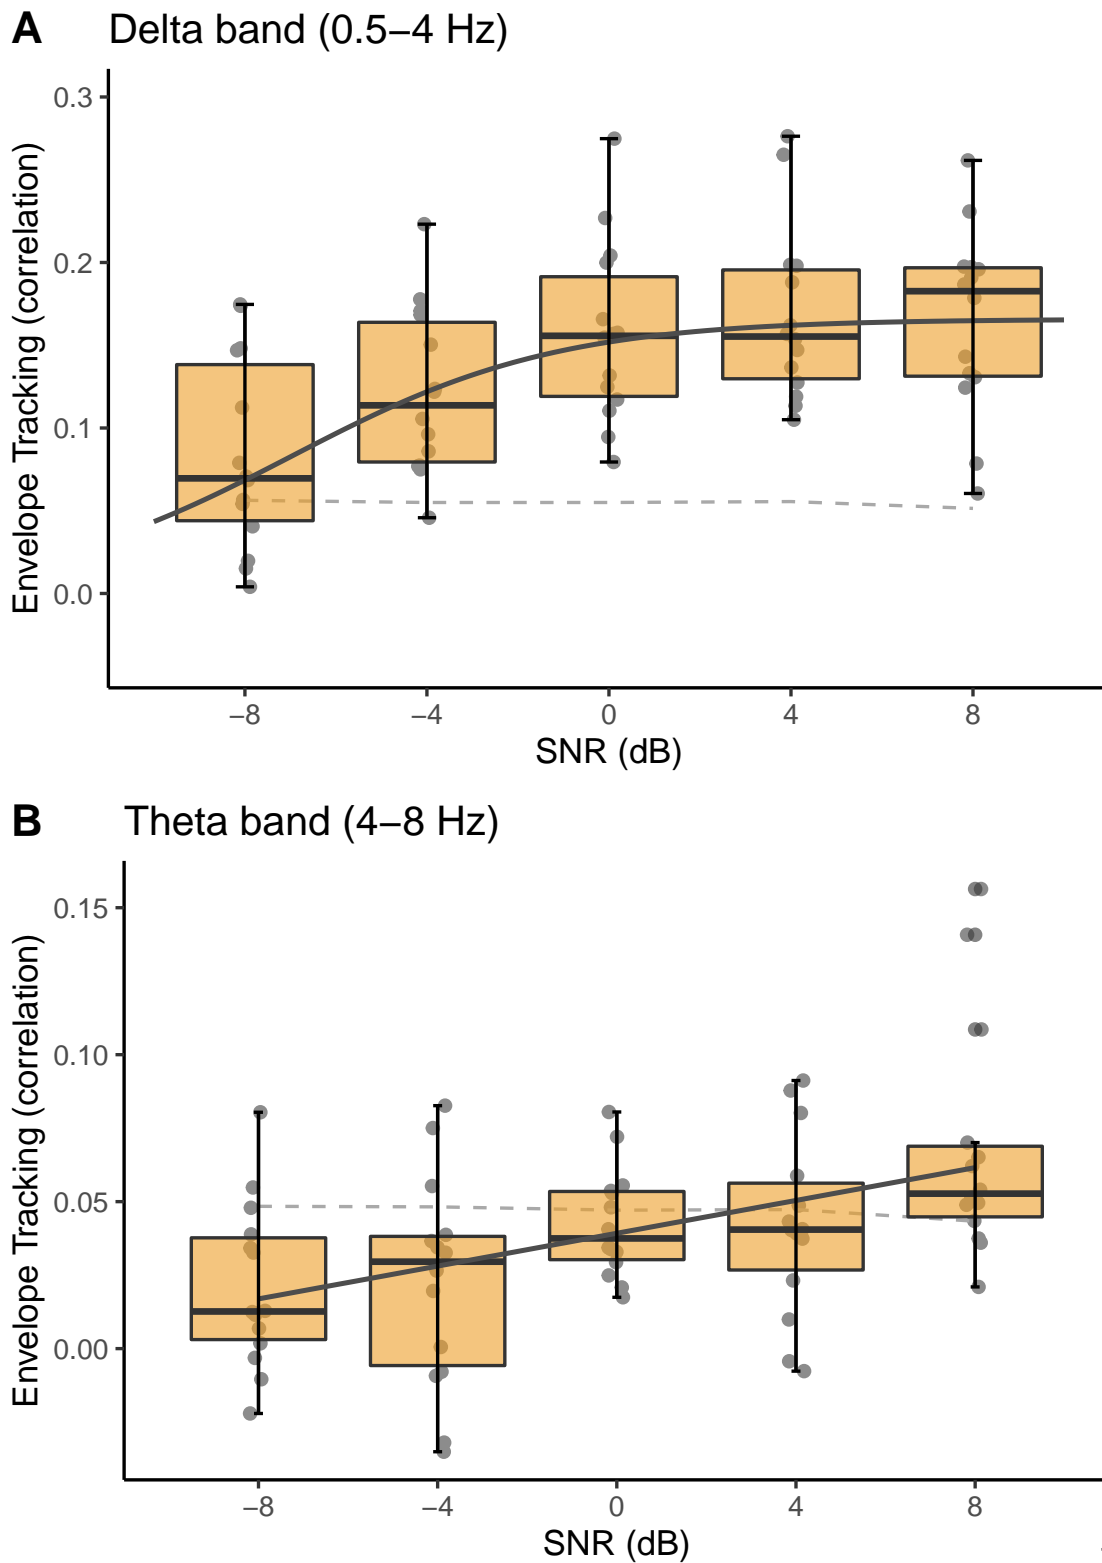

17

**Figure 2.** Neural envelope tracking as a function of stimulus SNR. **A** In the delta band, neural envelope tracking increases with increasing SNR until reaching a plateau around 0 dB SNR. The individual data points in each boxplot represent individual envelope reconstruction scores (i.e., correlation) to show variation. The solid line (dark grey) shows the sigmoid fitted to the data. The dashed line (light grey) shows the significance level of the envelope reconstruction scores. **B** In the theta band, neural envelope tracking monotonically increases with increasing SNR. However, limited statistically significant correlations were found below 8 dB SNR.

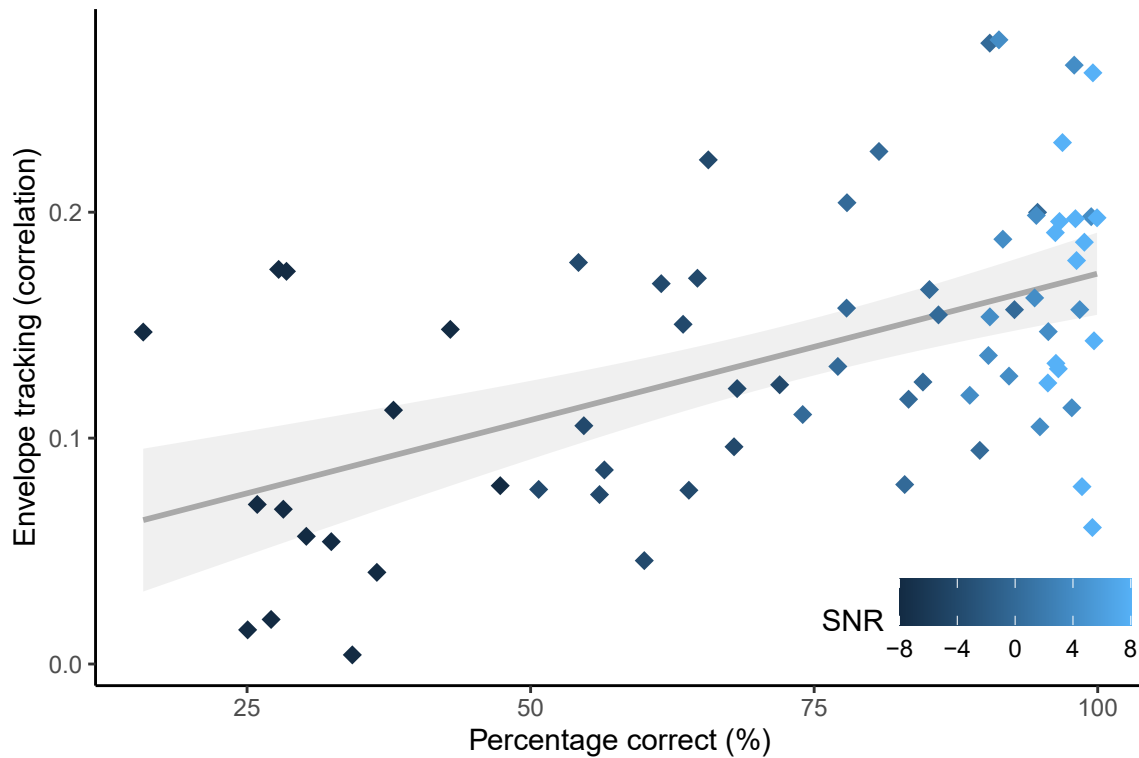

**Figure 3.** Relation between behavioral speech intelligibility and envelope tracking across all SNRs in the delta band. Envelope tracking increases with increasing speech intelligibility. The color gradient was used for illustrative purposes to mark SNR. The grey line shows the linear model fit. The shaded area represents the 95% confidence interval for the predictions of the linear model.

330 The topography of this peak (70-90 ms) is shown in Figure 4B. To investigate the influence  
331 of stimulus SNR on the peak latency and amplitude in more detail, the maximum TRF  
332 amplitude for every subject per SNR was calculated between 0 and 150 ms. As shown in  
333 Figure 4C and confirmed by statistical analysis, with increasing SNR, the peak amplitude  
334 increases ( $b = 4.71 \times 10^{-4}$ ,  $SE = 1.27 \times 10^{-4}$ ,  $p < 0.001$ ). In contrast, the latency of  
335 this peak decreases with increasing SNR ( $b = -1.22$ ,  $SE = 0.32$ ,  $p < 0.001$ ). Post-hoc  
336 comparisons between the adjacent SNR conditions demonstrated that amplitude increased  
337 significantly from -4 to 0 dB SNR ( $p = 0.029$ ;  $r = -0.582$ ), whereas latency decreased from  
338 -4 to 0 dB SNR ( $p = 0.002$ ;  $r = -0.808$ ). We did not find significant differences between the

339 two noisiest (-8 to -4 dB SNR:  $p > 0.05$ ) nor the two conditions with the lowest noise (0 to  
340 4 dB SNR:  $p > 0.05$ , 4 to 8 dB SNR:  $p > 0.05$ )

## 4 DISCUSSION

341 We examined the influence of stimulus SNR on neural envelope tracking of natural,  
342 continuous speech in young children. We recorded EEG in 14 normal-hearing pre-schoolers  
343 while they listened to age-appropriate stories at different stimulus SNRs. Neural tracking  
344 was investigated using both envelope reconstruction and TRF analysis. Our findings  
345 demonstrated that neural tracking of the speech envelope in the delta band (0.5-4 Hz)  
346 increased monotonically with increasing SNR, until stabilizing between 0 and 4 dB SNR,  
347 suggesting that neural envelope tracking remains stable as long as speech is intelligible.  
348 By contrast, neural tracking in the theta band (4-8 Hz) appeared to be more sensitive to  
349 noise. As SNR increased, neural tracking increased. However it is important to note that  
350 our results in the theta band did not fully indicate the presence of significant envelope  
351 reconstruction scores below 8 dB SNR. Lastly, we found that neural envelope tracking  
352 in the delta band was related to behavioral speech-in-noise performance, suggesting its  
353 potential for a realistic and objective measure of speech intelligibility in clinical practice.

354 We hypothesized that neural tracking of the speech envelope would increase as SNR, and  
355 thus speech intelligibility, increases. We demonstrated that this is indeed the case. However,  
356 in the delta band, we did not find a strictly monotonic increase of neural envelope tracking  
357 with SNR. As the SNR decreased, envelope reconstruction scores remained stable until  
358  $<0$  dB SNR, showing a S-shape correlation over SNRs (i.e., flat, followed by a decrease as  
359 SNR further decreases). Our finding aligns with previous results reported by Ding & Simon  
360 (2013) in which the effect of noise on neural entrainment to slow temporal modulations  
361 ( $<4$  Hz) was investigated. Based on MEG recordings, they found that neural responses in  
362 the delta band remained stable as the SNR decreased, until the noise background is more  
363 than twice as strong as the speech. In accordance, a more recent MEG study including  
364 children aged 6-9 (Vander Ghinst et al., 2019) found no difference in coherence to speech in

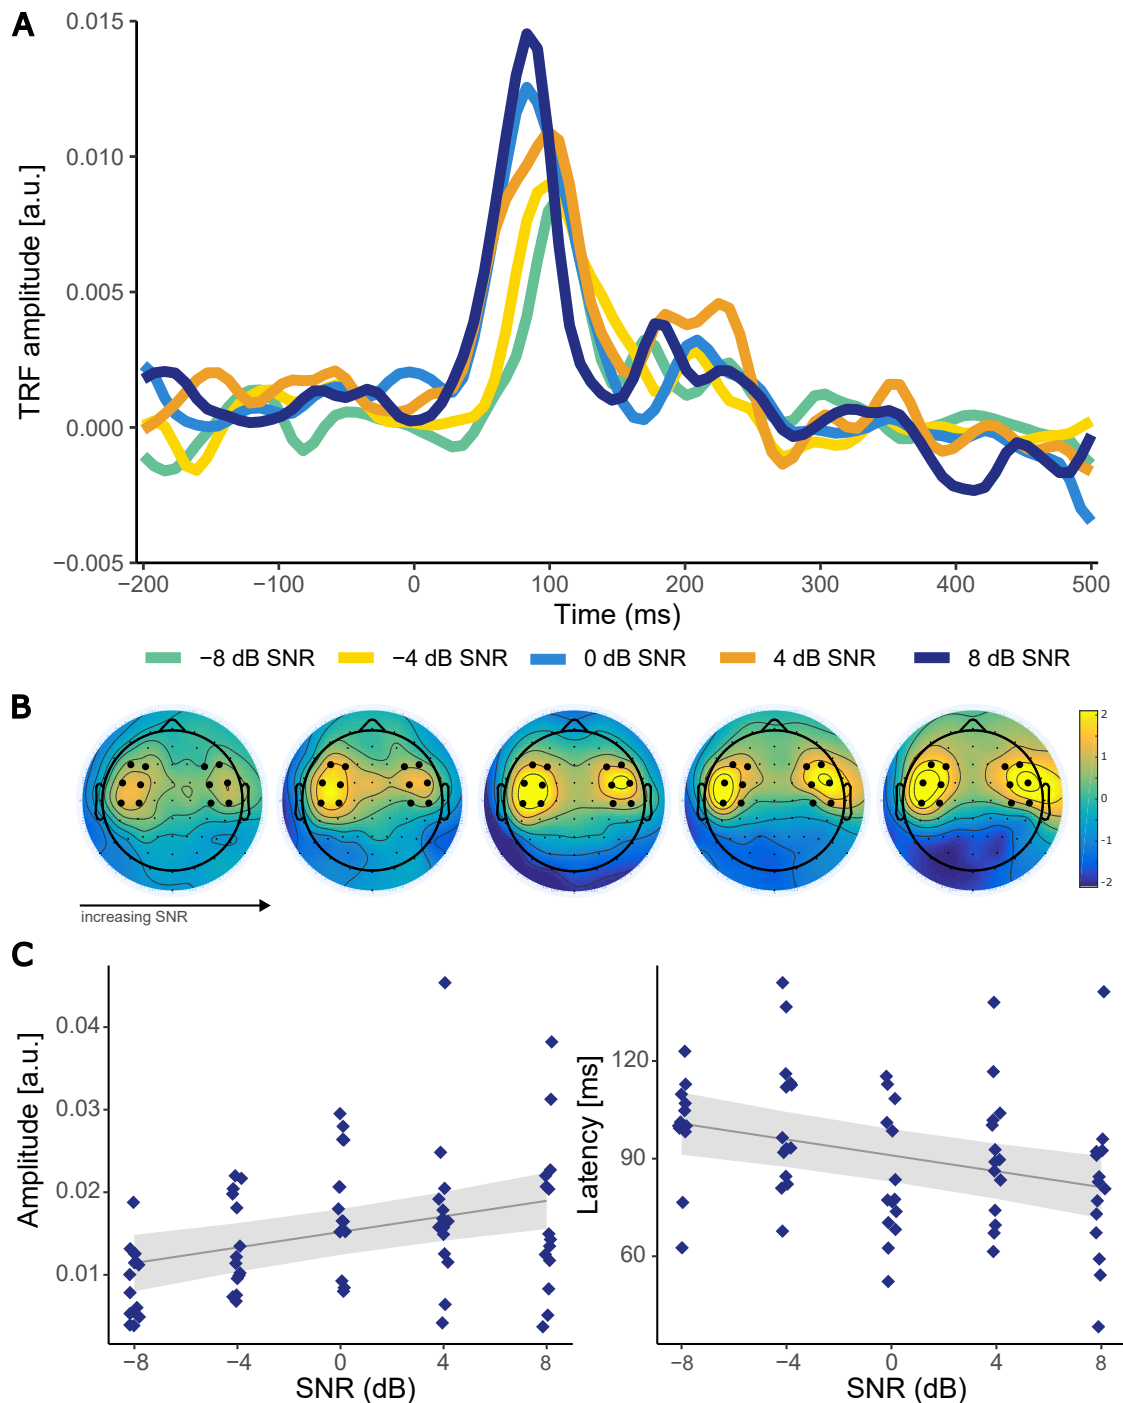

**Figure 4.** TRFs as a function of stimulus SNR. **A** Mean TRF activity over participants per SNR. **B** Topographies showing the associated peak topographies in the mean TRF (~70-90 ms) per SNR. Black dots represent the centro-frontal channels selected to calculate the TRFs in the time-domain in panel A. **C** The effect of SNR on peak amplitude (left) and latency (right) of the TRF. Every diamond (blue) represents an individual participant. The grey line shows the linear model fit. The shaded area represents the 95% confidence interval for the predictions of the linear model.

365 different levels of background noise (SNR ranging from +5 to -5 dB) at 1-4 Hz. Additionally,  
366 these results are consistent with the previous EEG work (Iotzov & Parra, 2019), including  
367 our own (Vanthornhout et al., 2018; Lesenfants et al., 2019a; Decruy et al., 2019), yielding  
368 an increase in neural tracking with SNR. However, Lesenfants et al. (2019a) reported  
369 a monotonic increase in the delta band, with neural tracking further increasing from -  
370 1 dB SNR to noiseless conditions, thus only reaching a maximum in quiet. The discrepancy  
371 with our current results could be attributed to the differences in experimental paradigm.  
372 Previous studies (e.g., Vanthornhout et al., 2018) used a 15-minute-long recording of a  
373 story presented without noise to train a linear decoder. Then, this decoder was applied to  
374 shorter 2-minute-long segments presented at different SNRs. A recent study (Verschueren  
375 et al., 2021), however, demonstrated that reconstruction accuracy changes when using  
376 different stimulus intensities to train and test the decoder on. This suggests that a decoder  
377 is optimized to decode brain responses presented at the intensity it was trained on. Thus,  
378 when training and testing on the same stimulus parameters, neural tracking seems robust to  
379 stimulus intensity.

380 Taken together, we hypothesize that acoustically degrading the speech signal, such as by  
381 adding background noise, does not influence neural tracking provided that speech remains  
382 intelligible. It is well known that speech intelligibility and SNR are highly correlated.  
383 Therefore, it can be challenging to disentangle to what extent a difference in neural tracking  
384 arises from a change in the acoustics, such as different levels of background noise, or  
385 changes in speech intelligibility itself. However, our results revealed that changes in auditory  
386 stimulus characteristics (i.e., SNR) did not necessarily alter neural tracking, supporting this  
387 hypothesis. Similarly to our electrophysiological measures, behaviorally measured speech  
388 intelligibility starts to decrease significantly below 0 dB SNR, whereas average scores at  
389 0 dB SNR exceeded 75%, reflecting good speech intelligibility for these young children  
390 (van Wieringen & Wouters, 2022). Thus, when acoustical degradation of the speech signal  
391 does not reflect a significant change in speech intelligibility, neural tracking in the delta  
392 band seems insensitive to stimulus SNR.

393 In contrast, neural envelope tracking in the theta band was influenced by stimulus SNR  
394 even though speech intelligibility remained high, replicating studies performed in adults  
395 (Ding & Simon, 2013; Verschueren et al., 2021). Furthermore, the number of children  
396 with significant tracking decreased with increasing noise level, suggesting that theta band  
397 tracking was more sensitive to SNR compared to the delta band. With limited noise present  
398 (i.e., 8 dB SNR), 11 of 14 children (delta band: 14 of 14 children) showed significant neural  
399 tracking of the speech envelope, whereas only 3 of 14 children (delta band: 9 of 14 children)  
400 still had significant neural responses when more noise was added (i.e., -4 dB SNR). This  
401 finding seems inconsistent with previous studies reporting significant theta tracking in adults  
402 (Bourguignon et al., 2013; Ding & Simon, 2013; Molinaro et al., 2016; Vanthornhout et al.,  
403 2018; Vander Ghinst et al., 2019; Lesenfants et al., 2019a). Yet, more recent results in young  
404 children also failed to demonstrate significant responses in the theta range (Vander Ghinst  
405 et al., 2019; Ríos-López et al., 2020).

406 The discrepancy between frequency bands could be rooted in developmental reasons such  
407 as the language acquisition stage of pre-school children. Previous behavioral results show  
408 that children's sensitivity to phonological units progresses from larger to smaller units,  
409 thus slow to fast information in the speech signal, as linguistic and reading skills improve  
410 (Ziegler & Goswami, 2005). However, several studies found evidence of an early-developed  
411 ability to discriminate syllables already in preterm infants (Mahmoudzadeh et al., 2013;  
412 Nittrouer, 2006). Therefore, this hypothesis is at odds with the view that tracking at theta  
413 frequencies correspond to the processing of syllabic units (e.g. Ding & Simon, 2012b; Gross  
414 et al., 2013; Ding et al., 2016). Additionally, theta responses are generally lower compared  
415 to delta tracking (e.g. Vander Ghinst et al., 2019; Verschueren et al., 2021), supporting  
416 an alternative hypothesis that delta and theta tracking reflect different speech perception  
417 mechanisms. That is, delta band neural tracking involves more higher-order speech specific  
418 processing, whereas theta band activity is more sensitive to acoustic processing of the  
419 speech signal (Molinaro & Lizarazu, 2017; Ding et al., 2016)

420 This explanation can be further strengthened by the fact that we found a significant  
421 correlation between speech intelligibility and neural envelope tracking in the delta band.  
422 This is in line with previous studies (Meyer et al., 2017; Vanthornhout et al., 2018;  
423 Verschueren et al., 2021, 2019; Etard & Reichenbach, 2019) consistently reporting that  
424 increased neural envelope tracking reflects better speech intelligibility. This is especially  
425 promising for clinical applications in hearing loss assessment and rehabilitation.

426 In addition to the envelope reconstruction analysis, our TRF analysis revealed one  
427 prominent positive TRF peak around 70–90 ms. In contrast, the TRF in adults typically  
428 contains two distinct peaks (e.g., Ding & Simon, 2012a, 2013; Vanthornhout et al., 2019;  
429 Verschueren et al., 2021, 2022). The first peak, here called the P1, occurs relatively  
430 fast with latencies around ~50 ms and is thought to reflect mainly acoustic processing,  
431 whereas the second peak occurs at longer latencies (~100–150 ms; N1), and might be  
432 influenced by top–down processing related to speech intelligibility and attention (Brodbeck  
433 & Simon, 2020). In line with observations of cortical auditory evoked potentials (CAEP),  
434 we believe the positive peak in this study could be related to the P1 as reported in adults. In  
435 general, CAEP traces in young children can be characterized by a large positive peak (P1),  
436 emerging between 100–150 ms, whereas components N1 and P2 emerge more gradually  
437 with maturation and might not be reliably evoked until the age of 7–9 years old Albrecht  
438 et al. (2000); Ponton et al. (2000); Ceponien et al. (1998). Besides the change in temporal  
439 pattern of the CAEP (e.g., peaks emerging with increasing age), peak latency decreases  
440 with age (Wunderlich et al., 2006). Therefore, age–related changes reflecting maturation of  
441 auditory neural processing might explain why our results did not reveal a clear N1 or P2  
442 component.

443 To further investigate how SNR affects the TRFs, we compared the individual peak  
444 amplitudes and latencies at the different stimulus SNRs. Our findings demonstrated that  
445 with increasing SNR, the amplitude of P1 increased. Furthermore, the latency of P1  
446 decreased as the SNR increased. These results dovetail with previous research with adult

447 participants showing that the amplitude of the early TRF peak ( $\sim 50$  ms) decreases, while  
448 the latency increases continuously with SNR (Ding & Simon, 2013; Jan et al., 2022). A  
449 delay in neural responses has been hypothesized to reflect a decrease in neural processing  
450 efficiency (Bidelman et al., 2019; Gillis et al., 2022a). In addition, increased latencies  
451 have previously been related to increasing task demand such as lower stimulus intensity,  
452 increasing background noise or vocoded speech both for neural processing of continuous  
453 speech (Mirkovic et al., 2019; Verschueren et al., 2021; Kraus et al., 2021) as well as simple  
454 sounds (Billings et al., 2015; Van Dun et al., 2016; Maamor & Billings, 2017; McClannahan  
455 et al., 2019). In the current study, we observed the same effect of background noise in  
456 pre-school children. However, the results in this study only showed significant differences  
457 in peak amplitude and/or latency from -4 to 0 dB SNR and not between the lower noise  
458 conditions, similar to the previously discussed envelope reconstruction results. This, again,  
459 suggests that decreasing the stimulus SNRs only influences the amplitude and latency  
460 of the neural response if speech intelligibility is affected. This aligns with the finding of  
461 Verschueren et al. (2021) that the P1 latency increased when audibility of the stimulus  
462 decreased, but only when audibility affected speech intelligibility and listening effort.

#### 463 **4.1 Limitations and future directions**

464 It is important to note that, in this study particular emphasis has been placed on neural  
465 tracking of the speech envelope. Even though the envelope is essential for speech  
466 intelligibility (Shannon et al., 1995), only taking into account basic acoustic properties  
467 as a measure of speech intelligibility might be an oversimplification. As reviewed in  
468 detail by Brodbeck & Simon (2020), neural responses can be predicted more accurately  
469 when not only considering other acoustic features, but also higher-level linguistic speech  
470 representations. Therefore, neural envelope tracking should be considered a measure to  
471 assess whether the pre-conditions for speech intelligibility are met, rather than a direct



472 measurement of speech intelligibility. Nevertheless, neural envelope tracking is shown to  
473 be quite robust, therefore remaining a good candidate for use in a clinical setting.

474 A second caveat of this study is that we included normal-hearing children as a first  
475 cohort, since speech intelligibility in noise had never been evaluated in such young children.  
476 However, for clinical applications of our measure, future research should study the impact  
477 of parameters such as hearing loss and hearing aid fitting. A number of studies have already  
478 demonstrated the use of CAEPs for validation of hearing aid fitting in hearing-impaired  
479 children (e.g., Chang et al., 2012; Glista et al., 2012; Baydan et al., 2019). Overall, their  
480 findings showed that aided behavioral thresholds were strongly correlated with CAEP  
481 responses to short non-speech as well as speech sounds. However, we believe that the use  
482 of continuous speech is more ecologically relevant compared to speech sounds and could  
483 potentially provide more information concerning the functionality of the hearing aid in  
484 daily life.

## 5 CONCLUSION

485 To summarize, the results of the present study showed that neural envelope tracking  
486 increases with increasing SNR. However, this increase is not strictly monotonic as delta  
487 band tracking converges between 0 and 4 dB SNR, similarly to the behavioral outcomes.  
488 Moreover, these results were confirmed by the TRF analysis, suggesting that neural tracking  
489 correlates with speech intelligibility rather than stimulus SNR. In contrast, the ability of  
490 children's brain to track the speech envelope in the theta band was drastically reduced and  
491 more easily corrupted by increasing noise in comparison to the delta band. Lastly, we found  
492 that neural envelope tracking in the delta band was directly associated with behavioral  
493 measures of speech intelligibility. Altogether, our findings provide a unique basis for a  
494 behavior-free evaluation of speech intelligibility in difficult-to-test populations, such as  
495 young children.

## AUTHOR STATEMENT

496 **Tilde Van Hirtum**: Formal analysis, investigation, data curation, writing-original draft,  
497 visualization and project administration. **Ben Somers**: Investigation, writing-review and  
498 editing, software. **Eline Verschueren**: Investigation, writing-review and editing and  
499 project administration. **Benjamin Dieudonné**: Writing-review and editing, software. **Tom**  
500 **Francart**: Conceptualization, methodology, writing-review and editing, supervision and  
501 funding acquisition.

## DECLARATION OF INTEREST

502 None.

## ACKNOWLEDGEMENTS

503 The authors are grateful to all the children and their parents who made time to participate  
504 in this study. The authors would also like to thank Mathilde Van Hecke for her help in  
505 data acquisition. Financial support was provided by the European Research Council (ERC)  
506 under the European Union's Horizon 2020 research and innovation programme [grant  
507 number 637424, Tom Francart]; the KU Leuven research fund [grant number C3/20/045]  
508 and VLAIO innovation mandate (IM) [grant number HBC.2021.0203, Ben Somers].

## REFERENCES

509 Abrams, D. A., Nicol, T., Zecker, S., & Kraus, N. (2009). Abnormal cortical processing  
510 of the syllable rate of speech in poor readers. *Journal of Neuroscience*, *29*, 7686–7693.  
511 doi:10.1523/JNEUROSCI.5242-08.2009.

512 Ahissar, E., Nagarajan, S., Ahissar, M., Protopapas, A., Mahncke, H., & Merzenich,  
513 M. M. (2001). Speech comprehension is correlated with temporal response patterns  
514 recorded from auditory cortex. *Proceedings of the National Academy of Sciences*, *98*,  
515 13367–13372. doi:10.1073/pnas.201400998.

- 516 Albrecht, R., Suchodoletz, W., & Uwer, R. (2000). The development of auditory evoked  
517 dipole source activity from childhood to adulthood. *Clinical Neurophysiology*, *111*,  
518 2268–2276. doi:[https://doi.org/10.1016/S1388-2457\(00\)00464-8](https://doi.org/10.1016/S1388-2457(00)00464-8).
- 519 Ambrose, S., Van Dam, M., & Moeller, M. P. (2014). Linguistic input, electronic media,  
520 and communication outcomes of toddlers with hearing loss. *Ear and Hearing*, *35*,  
521 139–147. doi:<https://doi.org/10.1097/AUD.0b013e3182a76768>.
- 522 Attaheri, A., Áine Ní Choisdealbha, Di Liberto, G. M., Rocha, S., Brusini, P., Mead,  
523 N., Olawole-Scott, H., Boutris, P., Gibbon, S., Williams, I., Grey, C., Flanagan, S.,  
524 & Goswami, U. (2022). Delta- and theta-band cortical tracking and phase-amplitude  
525 coupling to sung speech by infants. *NeuroImage*, *247*, 118698. doi:<https://doi.org/10.1016/j.neuroimage.2021.118698>.
- 527 Baydan, M., Batuk, M., & G., S. (2019). Relationship between aided cortical auditory  
528 evoked responses and aided behavioral thresholds. *International Journal of Pediatric*  
529 *Otorhinolaryngology*, *125*, 98 – 102. doi:10.1016/j.ijporl.2019.05.015.
- 530 Bennett, C. M., & Miller, M. B. (2010). How reliable are the results from functional  
531 magnetic resonance imaging? *Annals of the New York Academy of Sciences*, *1191*,  
532 133–155. doi:<https://doi.org/10.1111/j.1749-6632.2010.05446.x>.
- 533 Bidelman, G. M., Price, C. N., Shen, D., Arnott, S. R., & Alain, C. (2019). Afferent-efferent  
534 connectivity between auditory brainstem and cortex accounts for poorer speech-in-noise  
535 comprehension in older adults. *Hearing research*, *382*, 107795.
- 536 Biesmans, W., Das, N., Francart, T., & Bertrand, A. (2017). Auditory-inspired speech  
537 envelope extraction methods for improved EEG-based auditory attention detection in  
538 a cocktail party scenario. *IEEE Transactions on Neural Systems and Rehabilitation*  
539 *Engineering*, *25*, 402–412. doi:10.1109/TNSRE.2016.2571900.
- 540 Billings, C. J., Penman, T. M., McMillan, G. P., & Ellis, E. (2015). Electrophysiology and  
541 perception of speech in noise in older listeners: effects of hearing impairment and age.  
542 *Ear and hearing*, *36*, 710.

- 543 Bourguignon, M., De Tiège, X., de Beeck, M. O., Ligot, N., Paquier, P., Van Bogaert,  
544 P., Goldman, S., Hari, R., & Jousmäki, V. (2013). The pace of prosodic phrasing  
545 couples the listener's cortex to the reader's voice. *Human Brain Mapping*, *34*, 314–326.  
546 doi:<https://doi.org/10.1002/hbm.21442>.
- 547 Brodbeck, C. (2020). Eelbrain 0.34. [http://doi.org/10.5281/zenodo.](http://doi.org/10.5281/zenodo.3923991)  
548 3923991.
- 549 Brodbeck, C., & Simon, J. Z. (2020). Continuous speech processing. *Current Opinion in*  
550 *Physiology*, *18*, 25–31. doi:10.1016/j.cophys.2020.07.014.
- 551 Ceponien, R., Cheour, M., & Näätänen, R. (1998). Interstimulus interval and auditory event-  
552 related potentials in children: evidence for multiple generators. *Electroencephalography*  
553 *and Clinical Neurophysiology/Evoked Potentials Section*, *108*, 345–354. doi:[https://doi.org/10.1016/S0168-5597\(97\)00081-6](https://doi.org/10.1016/S0168-5597(97)00081-6).
- 554 //doi.org/10.1016/S0168-5597(97)00081-6.
- 555 Chang, H.-W., Dillon, H., Carter, L., van Dun, B., & Young, S.-T. (2012). The relationship  
556 between cortical auditory evoked potential (caep) detection and estimated audibility in  
557 infants with sensorineural hearing loss. *International Journal of Audiology*, *51*, 663–670.  
558 doi:10.3109/14992027.2012.690076.
- 559 Cragg, L., Kovacevic, N., McIntosh, A. R., Poulsen, C., Martinu, K., Leonard, G., &  
560 Paus, T. (2011). Maturation of EEG power spectra in early adolescence: a longitudinal  
561 study. *Developmental science*, *14*(5), 935–943. doi:10.1111/j.1467-7687.2010.  
562 01031.x.
- 563 David, S. V., Mesgarani, N., & Shamma, S. A. (2007). Estimating sparse spectro-temporal  
564 receptive fields with natural stimuli. *Network: Computation in Neural Systems*, *18*,  
565 191–212. doi:10.1080/09548980701609235.
- 566 Decruy, L., Vanthornhout, J., & Francart, T. (2019). Evidence for enhanced neural tracking  
567 of the speech envelope underlying age-related speech-in-noise difficulties. *Journal of*  
568 *neurophysiology*, *122*, 601–615. doi:10.1152/jn.00687.2018.
- 569 Destoky, F., Bertels, J., Niesen, M., Wens, V., Vander Ghinst, M., Rovai, A., Trotta, N.,  
570 Lallier, M., De Tiège, X., & Bourguignon, M. (2022). The role of reading experience in

- 571 atypical cortical tracking of speech and speech-in-noise in dyslexia. *NeuroImage*, 253,  
572 119061. doi:<https://doi.org/10.1016/j.neuroimage.2022.119061>.
- 573 Destoky, F., Philippe, M., Bertels, J., Verhasselt, M., Coquelet, N., Vander Ghinst, M.,  
574 Wens, V., De Tiège, X., & Bourguignon, M. (2019). Comparing the potential of meg and  
575 eeg to uncover brain tracking of speech temporal envelope. *NeuroImage*, 184, 201–213.  
576 doi:<https://doi.org/10.1016/j.neuroimage.2018.09.006>.
- 577 Di Liberto, G. M., Lalor, E. C., & Millman, R. E. (2018). Causal cortical dynamics  
578 of a predictive enhancement of speech intelligibility. *NeuroImage*, 166, 247–258.  
579 doi:[10.1016/j.neuroimage.2017.10.066](https://doi.org/10.1016/j.neuroimage.2017.10.066).
- 580 Ding, N., Chatterjee, M., & Simon, J. Z. (2014). Robust cortical entrainment to the  
581 speech envelope relies on the spectro-temporal fine structure. *NeuroImage*, 88, 41–46.  
582 doi:[10.1016/j.neuroimage.2013.10.054](https://doi.org/10.1016/j.neuroimage.2013.10.054).
- 583 Ding, N., Melloni, L., Zhang, H., Tian, X., & Poeppel, D. (2016). Cortical tracking of  
584 hierarchical linguistic structures in connected speech. *Nature Neuroscience*, 19, 158–64.  
585 doi:[10.1038/nn.4186](https://doi.org/10.1038/nn.4186).
- 586 Ding, N., & Simon, J. Z. (2012a). Emergence of neural encoding of auditory objects while  
587 listening to competing speakers. *Proceedings of the National Academy of Sciences of the*  
588 *United States of America*, 109, 11854–9. doi:[10.1073/pnas.1205381109](https://doi.org/10.1073/pnas.1205381109).
- 589 Ding, N., & Simon, J. Z. (2012b). Neural coding of continuous speech in auditory  
590 cortex during monaural and dichotic listening. *Journal of Neurophysiology*, 107, 78–89.  
591 doi:[10.1152/jn.00297.2011](https://doi.org/10.1152/jn.00297.2011).
- 592 Ding, N., & Simon, J. Z. (2013). Adaptive temporal encoding leads to a background-  
593 insensitive cortical representation of speech. *Journal of Neuroscience*, 33, 5728–5735.  
594 doi:[10.1523/JNEUROSCI.5297-12.2013](https://doi.org/10.1523/JNEUROSCI.5297-12.2013).
- 595 Dunn, L. M., & Dunn, L. M. (1997). *Peabody Picture Vocabulary Test—Third Edition*  
596 *(PPVT-III)*. (3rd ed.).
- 597 Eggermont, J. (2017). Hearing aids. (pp. 263–288). doi:[10.1016/](https://doi.org/10.1016/B978-0-12-805398-0.00009-8)  
598 B978-0-12-805398-0.00009-8.

- 599 Etard, O., & Reichenbach, T. (2019). Neural speech tracking in the theta and in the  
600 delta frequency band differentially encode clarity and comprehension of speech in noise.  
601 *Journal of Neuroscience*, *39*, 5750–5759.
- 602 Francart, T., van Wieringen, A., & Wouters, J. (2008). APEX 3: a multi-purpose test  
603 platform for auditory psychophysical experiments. *Journal of Neuroscience Methods*,  
604 *172*, 283–293. doi:10.1016/j.jneumeth.2008.04.020.
- 605 Gamer, M., Lemon, J., & puspendra.pusp22@gmail.com, I. F. P. S. (2019). *irr*:  
606 *Various Coefficients of Interrater Reliability and Agreement*. URL: [https://CRAN.](https://CRAN.R-project.org/package=irr)  
607 [R-project.org/package=irr](https://CRAN.R-project.org/package=irr) r package version 0.84.1.
- 608 Gillis, M., Decruy, L., Vanthornhout, J., & Francart, T. (2022a). Hearing loss is associated  
609 with delayed neural responses to continuous speech. *European Journal of Neuroscience*,  
610 *55*, 1671–1690. doi:<https://doi.org/10.1111/ejn.15644>.
- 611 Gillis, M., Van Canneyt, J., Francart, T., & Vanthornhout, J. (2022b). Neural tracking  
612 as a diagnostic tool to assess the auditory pathway. *Hearing Research*, *426*, 108607.  
613 doi:<https://doi.org/10.1016/j.heares.2022.108607>.
- 614 Glista, D., Easwar, V., Purcell, D. W., & Scollie, S. (2012). A pilot study on cortical  
615 auditory evoked potentials in children: Aided caeps reflect improved high-frequency  
616 audibility with frequency compression hearing aid technology. *International Journal of*  
617 *Otolaryngology*, *2012*. doi:10.1155/2012/982894.
- 618 Gross, J., Hoogenboom, N., Thut, G., Schyns, P., Panzeri, S., Belin, P., & Garrod, S. (2013).  
619 Speech rhythms and multiplexed oscillatory sensory coding in the human brain. *PLoS*  
620 *biology*, *11*, e1001752. doi:10.1371/journal.pbio.1001752.
- 621 Haufe, S., Meinecke, F., Görgen, K., Dähne, S., Haynes, J.-d., Blankertz, B., & Bießmann,  
622 F. (2014). NeuroImage On the interpretation of weight vectors of linear models in  
623 multivariate neuroimaging. *NeuroImage*, *87*, 96–110. doi:10.1016/j.neuroimage.  
624 2013.10.067.
- 625 Iotzov, I., & Parra, L. C. (2019). Eeg can predict speech intelligibility. *Journal of Neural*  
626 *Engineering*, *16*, 036008. doi:10.1088/1741-2552/ab07fe.

- 627 Jan, M., Kuruvila, I., & Hoppe, U. (2022). Prediction of speech intelligibility by means of  
628 eeg responses to sentences in noise. *Frontiers in Neuroscience*, *16*, 876421. doi:doi.  
629 org/10.3389/fnins.2022.876421.
- 630 Johnson, C. E. (2000). Children's phoneme identification in reverberation and noise.  
631 *Journal of Speech, Language, and Hearing Research*, *43*, 144–157. doi:10.1044/  
632 jslhr.4301.144.
- 633 Kalashnikova, M., Peter, V., Di Liberto, G. M., Lalor, E. C., & Burnham, D. (2018).  
634 Infant-directed speech facilitates seven-month-old infants' cortical tracking of speech.  
635 *Scientific reports*, *8*(1), 13745. doi:10.1038/s41598-018-32150-6.
- 636 Koo, T. K., & Li, M. Y. (2016). A guideline of selecting and reporting intraclass correlation  
637 coefficients for reliability research. *Journal of Chiropractic Medicine*, *15*, 155–163.  
638 doi:<https://doi.org/10.1016/j.jcm.2016.02.012>.
- 639 Kraus, F., Tune, S., Ruhe, A., Obleser, J., & Wostmann, M. (2021). Unilateral acoustic  
640 degradation delays attentional separation of competing speech. *Trends in Hearing*, *25*.  
641 doi:10.1177/23312165211013242.
- 642 Lalor, E. C., Pearlmutter, B. A., Reilly, R. B., McDarby, G., & Foxe, J. J. (2006). The  
643 VESPA: A method for the rapid estimation of a visual evoked potential. *NeuroImage*, *32*,  
644 1549–1561. doi:10.1016/j.neuroimage.2006.05.054.
- 645 Leibold, L. J. (2017). Speech Perception in Complex Acoustic Environments:  
646 Developmental Effects. *Journal of Speech, Language, and Hearing Research*, *60*,  
647 3001–3008.
- 648 Lesenfans, D., Vanthornhout, J., Verschueren, E., Decruy, L., & Francart, T. (2019a).  
649 Predicting individual speech intelligibility from the neural tracking of acoustic- and  
650 phonetic-level speech representations. *Hearing Research*, *380*, 1–9. doi:10.1016/j.  
651 hears.2019.05.006.
- 652 Lesenfans, D., Vanthornhout, J., Verschueren, E., & Francart, T. (2019b). Data-driven  
653 spatial filtering for improved measurement of cortical tracking of multiple representations  
654 of speech. *Journal of Neural Engineering*, *16*, 066017. doi:10.1088/1741-2552/



- 655 ab3c92.
- 656 Maamor, N., & Billings, C. J. (2017). Cortical signal-in-noise coding varies by noise  
657 type, signal-to-noise ratio, age, and hearing status. *Neuroscience Letters*, *636*, 258–264.  
658 doi:<https://doi.org/10.1016/j.neulet.2016.11.020>.
- 659 Mahmoudzadeh, M., Ghislaine, D.-L., Fournier, M., Kongolo, G., Goudjil, S., Dubois, J.,  
660 Grebe, R., & Wallois, F. (2013). Syllabic discrimination in premature human infants  
661 prior to complete formation of cortical layers. *PNAS*, *110*, 4846–4851. doi:10.1073/  
662 pnas.1212220110.
- 663 McClannahan, K. S., Backer, K., & Tremblay, K. L. (2019). Auditory evoked responses in  
664 older adults with normal hearing, untreated, and treated age-related hearing loss. *Ear*  
665 *and hearing*, *40*, 1106–1116.
- 666 Mendel, L. L. (2008). Current considerations in pediatric speech audiometry. *International*  
667 *Journal of Audiology*, *47*, 546–553. doi:10.1080/14992020802252261.
- 668 Meyer, L., Henry, M. J., Gaston, P., Schmuck, N., & Friederici, A. D. (2017). Linguistic  
669 Bias Modulates Interpretation of Speech via Neural Delta-Band Oscillations. *Cerebral*  
670 *Cortex*, *27*, 4293–4302. doi:10.1093/cercor/bhw228.
- 671 Mirkovic, B., Debener, S., Schmidt, J., Jaeger, M., & Neher, T. (2019). Effects of  
672 directional sound processing and listener 's motivation on EEG responses to continuous  
673 noisy speech : Do normal-hearing and aided hearing-impaired listeners differ? *Hearing*  
674 *Research*, *377*, 260–270. doi:10.1016/j.heares.2019.04.005.
- 675 Molinaro, N., & Lizarazu, M. (2017). Delta(but not theta)-band cortical entrainment  
676 involves speech-specific processing. *European Journal of Neuroscience*, *9*, 1–9. doi:10.  
677 1111/ejn.13811.
- 678 Molinaro, N., Lizarazu, M., Lallier, M., Bourguignon, M., & Carreiras, M. (2016). Out-of-  
679 synchrony speech entrainment in developmental dyslexia. *Human Brain Mapping*, *37*,  
680 2767–2783. doi:<https://doi.org/10.1002/hbm.23206>.
- 681 Neuman, A., Wroblewski, M., Hajicek, J., & Rubinstein, A. (2010). Combined effects of  
682 noise and reverberation on speech recognition performance of normal-hearing children



- 683 and adults. *Ear and Hearing*, *31*, 336–344. doi:[https://doi.org/10.1097/AUD.](https://doi.org/10.1097/AUD.0b013e3181d3d514)  
684 0b013e3181d3d514.
- 685 Nittrouer, S. (2006). Children hear the forest. *The Journal of the Acoustical Society of*  
686 *America*, *120*, 1799–1802. doi:10.1121/1.2335273.
- 687 O’Donoghue, G. (2013). Cochlear implants — science, serendipity, and success. *New*  
688 *England Journal of Medicine*, *369*, 1190–1193. doi:10.1056/NEJMp1310111.
- 689 Oostenveld, R., Fries, P., Maris, E., & Schoffelen, J.-M. (2011). FieldTrip: Open Source  
690 Software for Advanced Analysis of MEG, EEG, and Invasive Electrophysiological Data.  
691 *Computational Intelligence and Neuroscience*, . doi:10.1155/2011/156869.
- 692 Panda, E., Emami, Z., Valiante, T., & EW, P. (2020). EEG phase synchronization during  
693 semantic unification relates to individual differences in children’s vocabulary skill.  
694 *Developmental science*, *24(1)*, e12984. doi:10.1111/desc.12984.
- 695 Peelle, J. E., Gross, J., & Davis, M. H. (2013). Phase-Locked Responses to Speech in  
696 Human Auditory Cortex are Enhanced During Comprehension. *Cerebral Cortex*, *23*,  
697 1378–1387. doi:10.1093/cercor/bhs118.
- 698 Pinheiro, J., Bates, D., & R Core Team (2022). *nlme: Linear and Nonlinear Mixed Effects*  
699 *Models*. URL: <https://CRAN.R-project.org/package=nlme> r package  
700 version 3.1-161.
- 701 Ponton, C. W., Eggermont, J. J., Kwong, B., & Don, M. (2000). Maturation  
702 of human central auditory system activity: evidence from multi-channel evoked  
703 potentials. *Clinical Neurophysiology*, *111*, 220–236. doi:[https://doi.org/10.](https://doi.org/10.1016/S1388-2457(99)00236-9)  
704 1016/S1388-2457(99)00236-9.
- 705 Power, A., Mead, N., Barnes, L., & Goswami, U. (2013). Neural entrainment to rhythmic  
706 speech in children with developmental dyslexia. *Frontiers in Human Neuroscience*, *7*,  
707 777. doi:10.3389/fnhum.2013.00777.
- 708 Power, A. J., Colling, L. J., Mead, N., Barnes, L., & Goswami, U. (2016). Neural encoding  
709 of the speech envelope by children with developmental dyslexia. *Brain and Language*,  
710 *160*, 1–10. doi:<https://doi.org/10.1016/j.bandl.2016.06.006>.

- 711 R Core Team (2020). R: A language and environment for statistical computing. URL:  
712 <https://www.r-project.org/>.
- 713 Ríos-López, P., Molinaro, N., Bourguignon, M., & Lallier, M. (2020). Development  
714 of neural oscillatory activity in response to speech in children from 4 to 6 years old.  
715 *Developmental science*, 23(6), e12947. doi:10.1111/desc.12947.
- 716 Rosen, S. (1992). Temporal information in speech : acoustic , auditory and linguistic  
717 aspects. *Philosophical Transactions of the Royal Society*, 336, 367–373.
- 718 Schneider, J. M., & Maguire, M. J. (2019). Developmental differences in the neural  
719 correlates supporting semantics and syntax during sentence processing. *Developmental*  
720 *Science*, 22, e12782. doi:<https://doi.org/10.1111/desc.12782>.
- 721 Shannon, R. V., Zeng, F. G., Kamath, V., Wygonski, J., & Ekelid, M. (1995). Speech  
722 recognition with primarily temporal cues. *Science*, 270, 303–304.
- 723 Shrout PE, F. J. (1979). Intraclass correlations: uses in assessing rater reliability.  
724 *Psychological Bulletin*, 86, 420–428. doi:10.1037//0033-2909.86.2.420.
- 725 Somers, B., Francart, T., & Bertrand, A. (2018). A generic EEG artifact removal algorithm  
726 based on the multi-channel Wiener filter. *Journal of neural engineering*, 15, 036007.  
727 doi:10.1088/1741-2552/aaac92.
- 728 Talarico, M., Abdilla, G., Aliferis, M., Balazic, I., Giaprakis, I., Stefanakis, T., Foenander,  
729 K., Grayden, D., & Paolini, A. (2007). Effect of Age and Cognition on Childhood  
730 Speech in Noise Perception Abilities. *Audiology and Neurotology*, 12, 1420–3030.
- 731 Tan, J. S. H., Kalashnikova, M., Di Liberto, G. M., Crosse, M. J., & Burnham, D. (2022).  
732 Seeing a talking face matters: The relationship between cortical tracking of continuous  
733 auditory-visual speech and gaze behaviour in infants, children and adults. *NeuroImage*,  
734 256, 119217. doi:10.1016/j.neuroimage.2022.119217.
- 735 The MathWorks Inc (2016). MATLAB and Statistics Toolbox Release 2013a.
- 736 Van Dun, B., Kania, A., & Dillon, H. (2016). Cortical auditory evoked potentials in (un)  
737 aided normal-hearing and hearing-impaired adults. *Seminars in hearing*, 37, 9.

- 738 van Wieringen, A., & Wouters, J. (2022). Lilliput: age-appropriate words in speech-  
739 weighted noise and in quiet for young Dutch speaking children. *International Journal of*  
740 *Audiology*, . doi:10.1080/14992027.2022.2086491.
- 741 Vander Ghinst, M., Bourguignon, M., Niesen, M., Wens, V., Hassid, S., Choufani, G.,  
742 Jousmäki, V., Hari, R., Goldman, S., & De Tiège, X. (2019). Cortical Tracking of  
743 Speech-in-Noise Develops from Childhood to Adulthood. *The Journal of neuroscience*,  
744 *39(15)*, 2938–2950. doi:10.1523/JNEUROSCI.1732-18.2019.
- 745 Vanthornhout, J., Decruy, L., & Francart, T. (2019). Effect of task and attention on  
746 neural tracking of speech. *Frontiers in Neuroscience*, *13*. doi:10.3389/fpsyg.2019.  
747 00449.
- 748 Vanthornhout, J., Decruy, L., Wouters, J., Simon, J. Z., & Francart, T. (2018). Speech  
749 intelligibility predicted from neural entrainment of the speech envelope. *Journal of the*  
750 *Association for Research in Otolaryngology*, *19*, 181–191.
- 751 Verschueren, E., Gillis, M., Decruy, L., Vanthornhout, J., & Francart, T. (2022). Speech  
752 understanding oppositely affects acoustic and linguistic neural tracking in a speech  
753 rate manipulation paradigm. *Journal of Neuroscience*, *42*, 7442–7453. doi:10.1523/  
754 JNEUROSCI.0259-22.2022.
- 755 Verschueren, E., Somers, B., & Francart, T. (2019). Neural envelope tracking as a measure  
756 of speech understanding in cochlear implant users. *Hearing research*, *373*, 23–31.  
757 doi:10.1016/j.heares.2018.12.004.
- 758 Verschueren, E., Vanthornhout, J., & Francart, T. (2020). The effect of stimulus choice on an  
759 eeg-based objective measure of speech intelligibility. *Ear and Hearing*, *41*, 1586–1597.
- 760 Verschueren, E., Vanthornhout, J., & Francart, T. (2021). The effect of stimulus intensity  
761 on neural envelope tracking. *Hearing Research*, *403*, 108175.
- 762 Wang, J., Sung, V., Carew, P., Burt, R. A., Liu, M., Wang, Y., Afandi, A., & Wake, M.  
763 (2019). Prevalence of childhood hearing loss and secular trends: A systematic review  
764 and meta-analysis. *Academic Pediatrics*, *19*, 504–514. doi:[https://doi.org/10.](https://doi.org/10.1016/j.acap.2019.01.010)  
765 [1016/j.acap.2019.01.010](https://doi.org/10.1016/j.acap.2019.01.010).

- 766 World Health Organization (2021). Deafness and hearing loss.  
767 [https://www.who.int/news-room/fact-sheets/detail/  
768 deafness-and-hearing-loss](https://www.who.int/news-room/fact-sheets/detail/deafness-and-hearing-loss). Accessed: 2021-04-01.
- 769 Wunderlich, J. L., Cone-Wesson, B. K., & Shepherd, R. (2006). Maturation of the cortical  
770 auditory evoked potential in infants and young children. *Hearing Research*, 212, 185–202.  
771 doi:<https://doi.org/10.1016/j.heares.2005.11.010>.
- 772 Ziegler, J. C., & Goswami, U. (2005). Reading acquisition, developmental dyslexia, and  
773 skilled reading across languages: a psycholinguistic grain size theory. *Psychological  
774 Bulletin*, 131, 3–29. doi:10.1037/0033-2909.131.1.3.

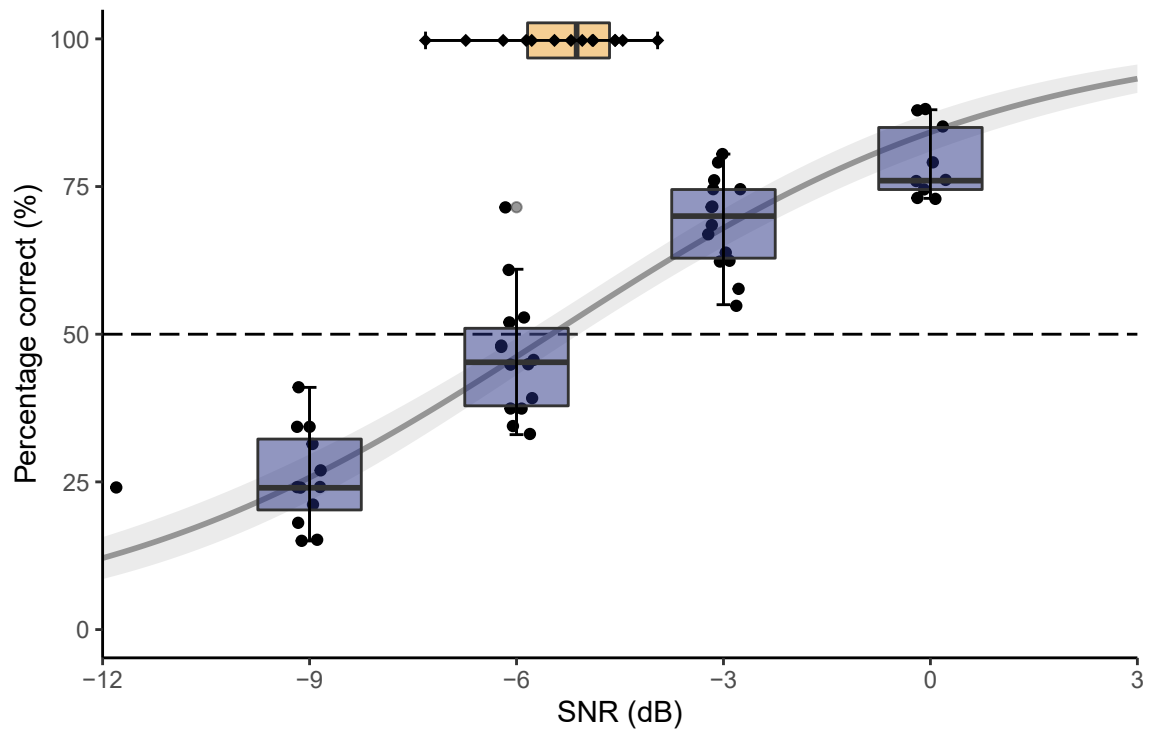

**A** Delta band (0.5–4 Hz)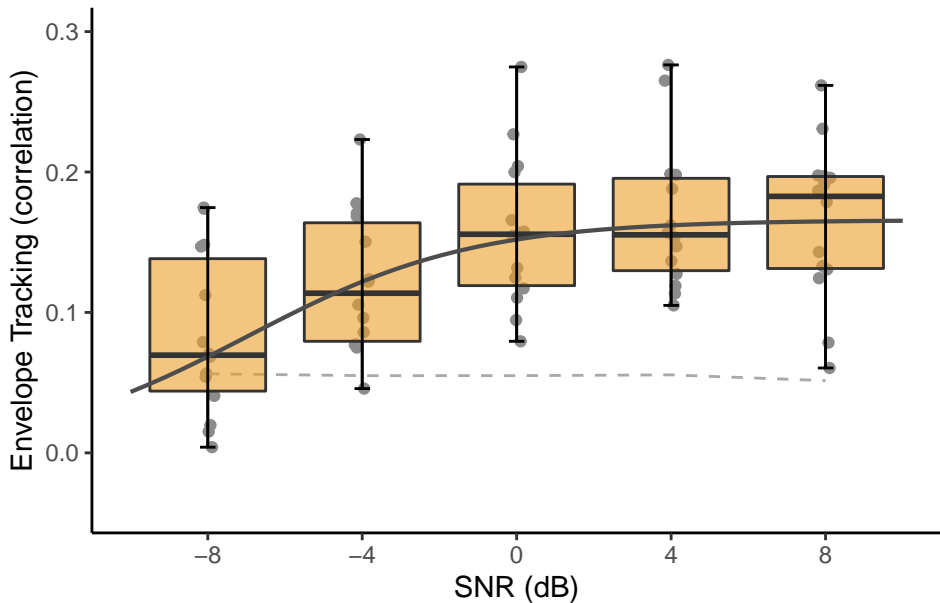**B** Theta band (4–8 Hz)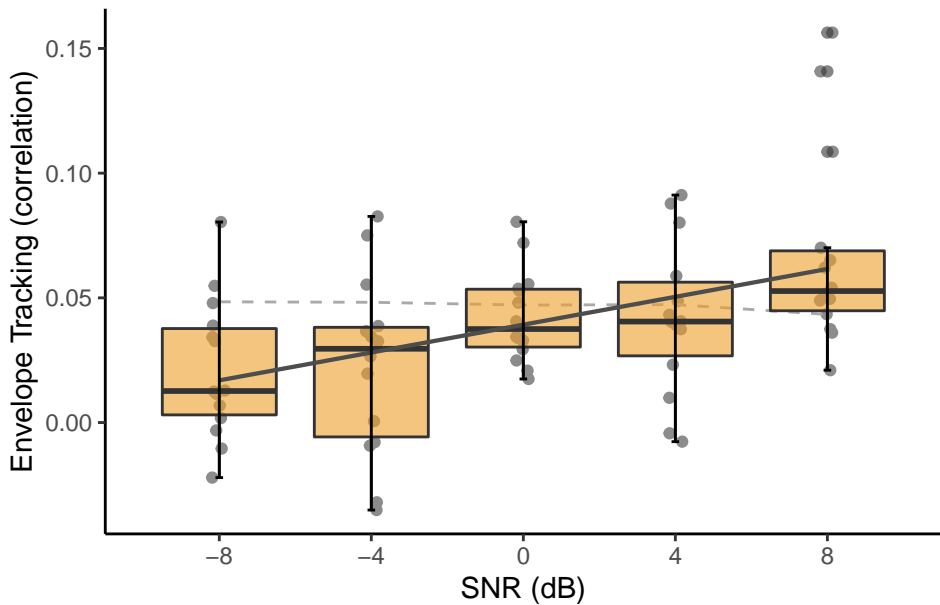

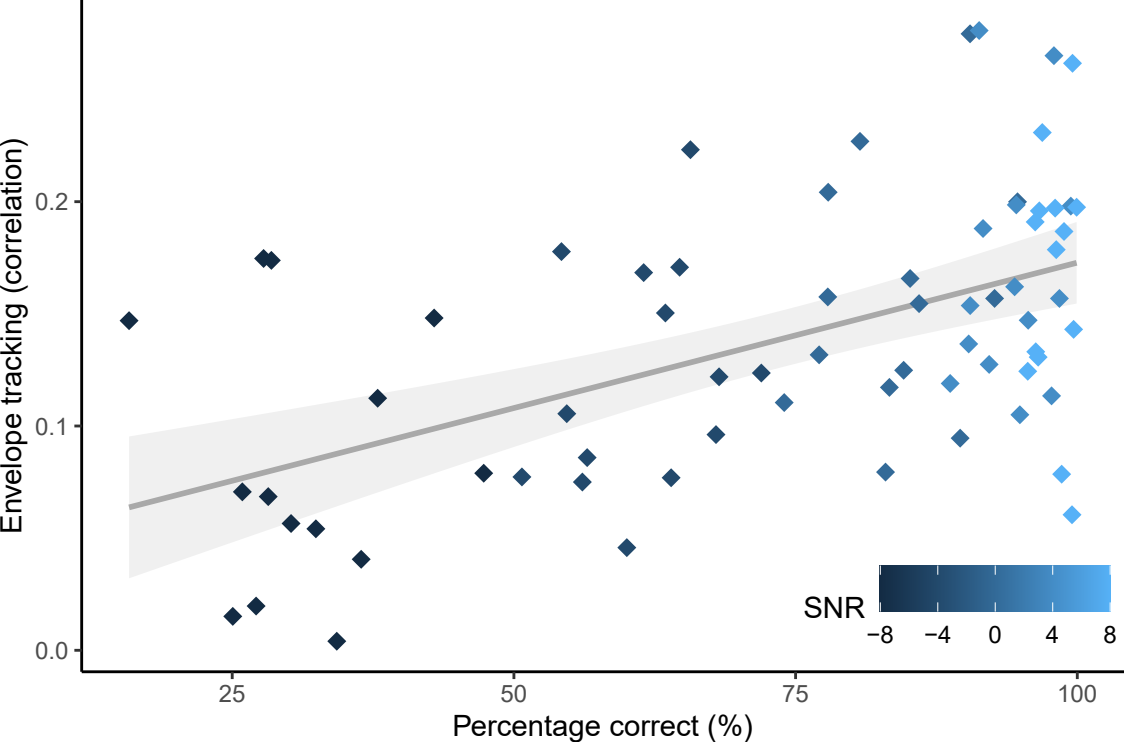

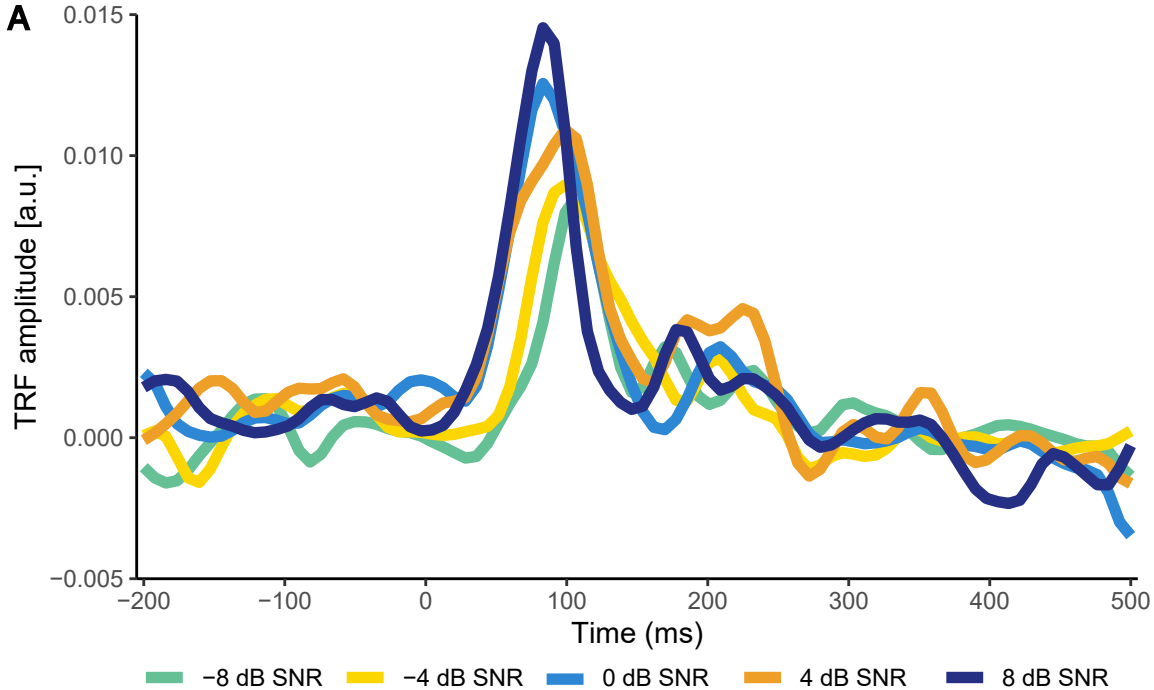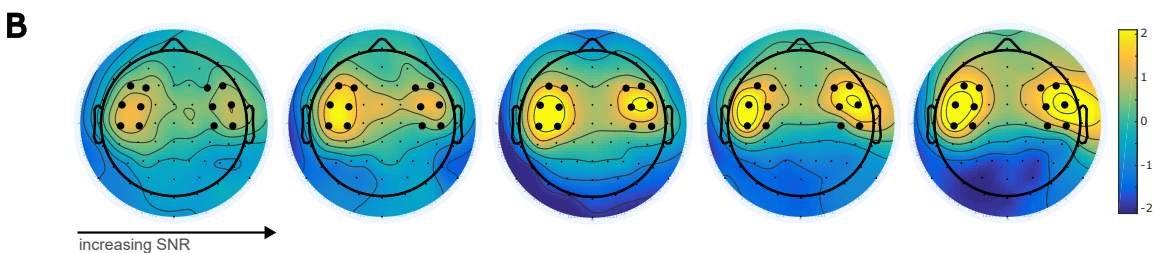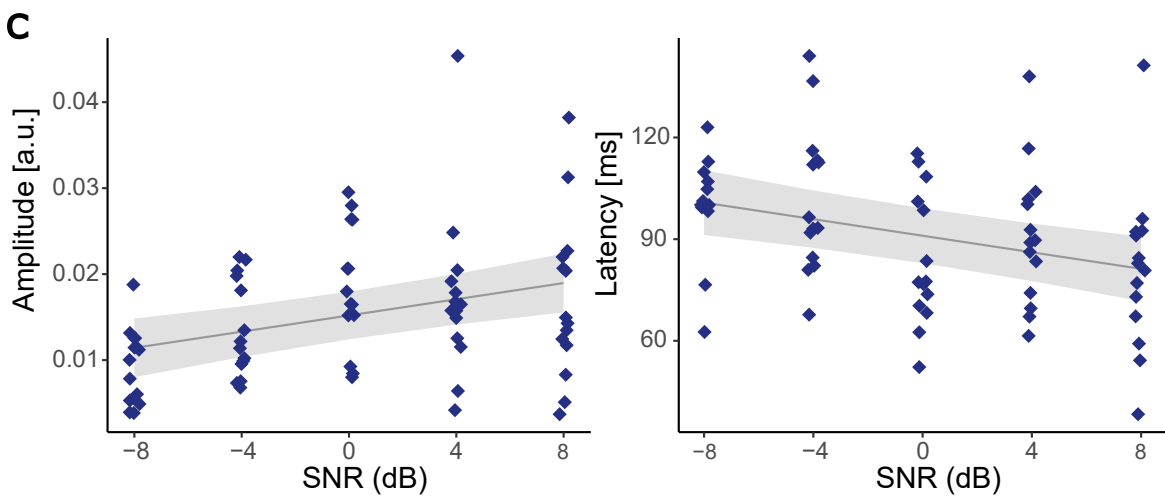

Source: https://www.biorxiv.org/content/10.1101/2023.02.22.529509v1.full.pdf
